# Supplementary material for: Bridging the gap between manganese oxide precursor synthesis and lithium manganese oxide cathodes for high-voltage lithium-ion batteries
Source: Royal Society of Chemistry journal article supplement (doi:10.1039/d4ta06485b), 2024-12-17
Supplement: d4ta06485b1.pdf [file d4ta06485b1.pdf]

*Bridging the Gap between Manganese Oxide Precursors  
Synthesis and Lithium Manganese Oxide Cathodes for  
High-Voltage Lithium-Ion Batteries*

*Mariam Baazizi <sup>a,b</sup>, Mehdi Karbak <sup>a</sup>, Mohamed Aqil <sup>a</sup>, Simon Sayah <sup>b</sup>, Mouad Dahbi <sup>a</sup>, Fouad Ghamouss <sup>a\*</sup>*

*<sup>a</sup> Department of Materials Science, Energy, and Nano-Engineering, Mohamed VI Polytechnic University, Ben Guerir, Morocco.*

*<sup>b</sup> Laboratory of Physical-Chemistry of Materials and Electrolytes for Energy (PCM2E), University of Tours, 37200 Tours, France.*

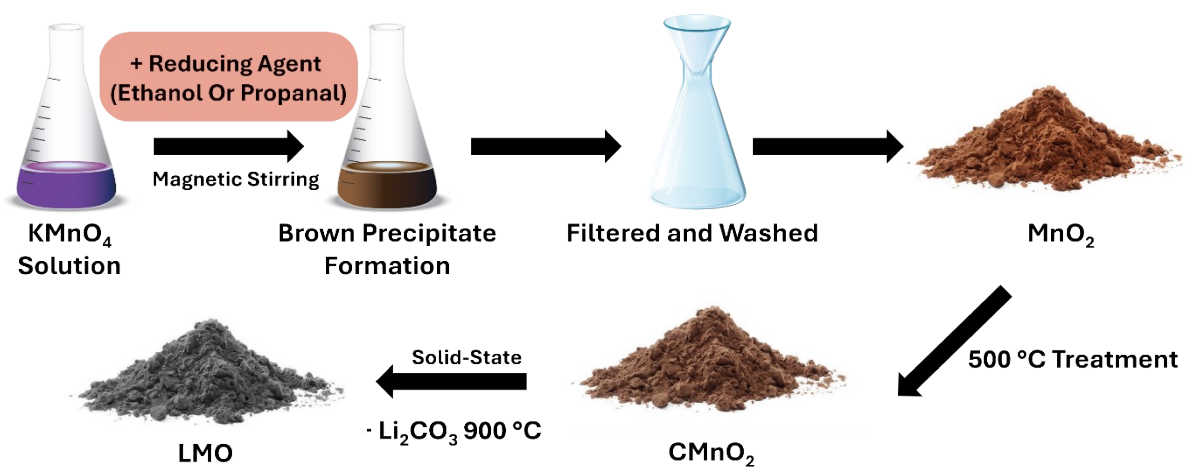

Figure S1: Schematic illustration of the synthesis of MnO<sub>2</sub>, CMnO<sub>2</sub> and LMO using ethanol (-OH) and propanal (-CHO)

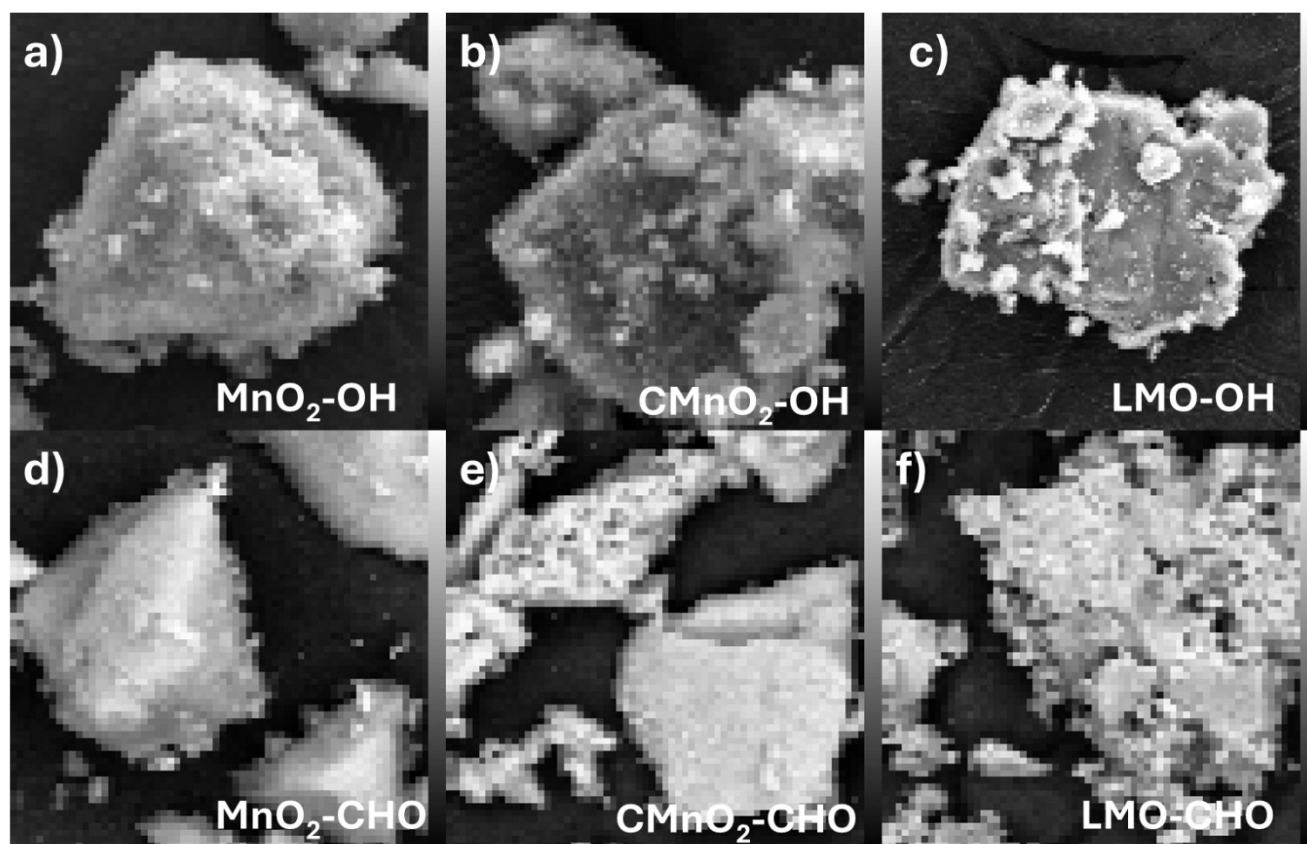

Figure S2: SEM images of a)  $\text{MnO}_2\text{-OH}$ , b)  $\text{CMnO}_2\text{-OH}$ , c)  $\text{LMO-OH}$ , d)  $\text{MnO}_2\text{-CHO}$ , e)  $\text{CMnO}_2\text{-CHO}$  f)  $\text{LMO-CHO}$

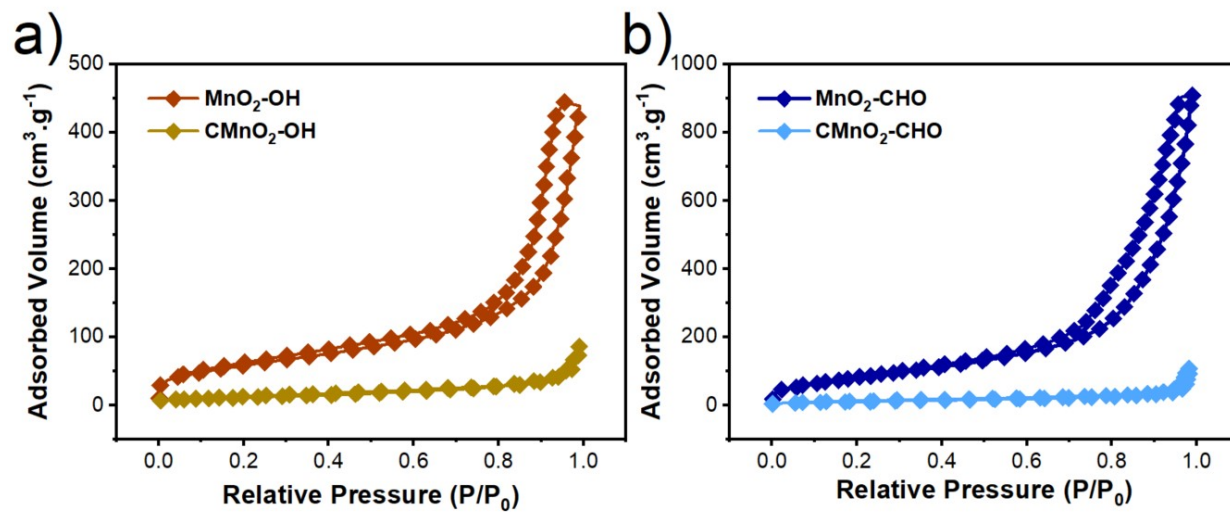

Figure S3: Adsorption isotherms of a) MnO<sub>2</sub>-OH and CMnO<sub>2</sub>-OH, b) MnO<sub>2</sub>-CHO and CMnO<sub>2</sub>-CHO

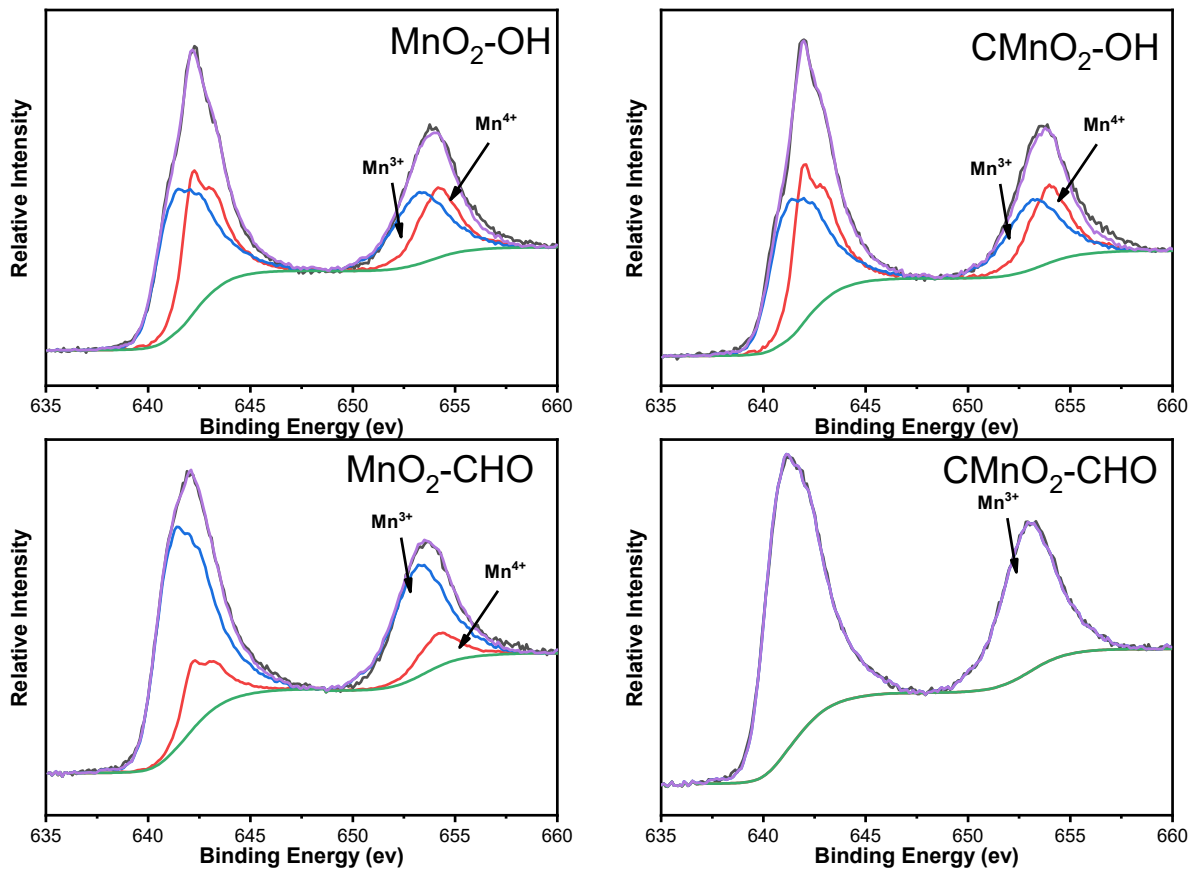

Figure S4: XPS Mn 2p of MnO<sub>2</sub>-OH, CMnO<sub>2</sub>-OH, MnO<sub>2</sub>-CHO, and CMnO<sub>2</sub>-CHO

| Material            | MnO <sub>2</sub> -OH |                  |       |                |       |         |       |       |             |
|---------------------|----------------------|------------------|-------|----------------|-------|---------|-------|-------|-------------|
| Core Peak           | Mn 2p                |                  | O 1s  |                |       | C 1s    |       |       | K 2p        |
| Component           | Mn <sup>3+</sup>     | Mn <sup>4+</sup> | O-Mn  | O <sup>-</sup> | O-C   | C-C,C-H | C-O   | C=O   |             |
| Binding Energy (eV) | 641,4                | 642,2            | 529,8 | 531,4          | 532,8 | 285,0   | 286,2 | 288,6 | 292,8-295,6 |
| Atomic %            | 11,2                 | 8,5              | 36,4  | 8,1            | 1,8   | 18,7    | 2,5   | 2,8   | 10,1        |
| Total Atomic %      | 19,7                 |                  | 46,3  |                |       | 24,0    |       |       | 10,1        |

Table S1: XPS composition table obtained for MnO<sub>2</sub>-OH

| Material            | CMnO <sub>2</sub> -OH |                  |       |                |       |         |       |       |             |
|---------------------|-----------------------|------------------|-------|----------------|-------|---------|-------|-------|-------------|
| Core Peak           | Mn 2p                 |                  | O 1s  |                |       | C 1s    |       |       | K 2p        |
| Component           | Mn <sup>3+</sup>      | Mn <sup>4+</sup> | O-Mn  | O <sup>-</sup> | O-C   | C-C,C-H | C-O   | C=O   |             |
| Binding Energy (eV) | 641,3                 | 642,0            | 529,5 | 530,9          | 532,8 | 285,0   | 286,4 | 288,5 | 292,2-295,0 |
| Atomic %            | 9,6                   | 8,2              | 33,8  | 8,7            | 2,0   | 21,6    | 3,0   | 2,7   | 10,5        |
| Total Atomic %      | 17,8                  |                  | 44,5  |                |       | 27,3    |       |       | 10,5        |

Table S2: XPS composition table obtained for CMnO<sub>2</sub>-OH

| Material            | MnO <sub>2</sub> -CHO |                  |       |                |       |         |       |       |      |
|---------------------|-----------------------|------------------|-------|----------------|-------|---------|-------|-------|------|
| Core Peak           | Mn 2p                 |                  | O 1s  |                |       | C 1s    |       |       | K 2p |
| Component           | Mn <sup>3+</sup>      | Mn <sup>4+</sup> | O-Mn  | O <sup>-</sup> | O-C   | C-C,C-H | C-O   | C=O   |      |
| Binding Energy (eV) | 641,4                 | 642,2            | 529,7 | 531,3          | 532,9 | 285,0   | 286,3 | 288,8 | --   |
| Atomic %            | 10,9                  | 2,5              | 18,8  | 14,9           | 3,3   | 39,4    | 4,8   | 3,6   | --   |
| Total Atomic %      | 13,4                  |                  | 37,0  |                |       | 47,8    |       |       | --   |

Table S3: XPS composition table obtained for MnO<sub>2</sub>-CHO

| Material            | CMnO <sub>2</sub> -CHO |                  |       |                |       |         |       |       |             |
|---------------------|------------------------|------------------|-------|----------------|-------|---------|-------|-------|-------------|
| Core Peak           | Mn 2p                  |                  | O 1s  |                |       | C 1s    |       |       | K 2p        |
| Component           | Mn <sup>3+</sup>       | Mn <sup>4+</sup> | O-Mn  | O <sup>-</sup> | O-C   | C-C,C-H | C-O   | C=O   | 292,7-295,5 |
| Binding Energy (eV) | 641,1                  | -                | 529,6 | 531,0          | 532,6 | 285,0   | 286,3 | 288,8 | --1,5-1,5   |
| Atomic %            | 17,6                   | -                | 27,5  | 10,3           | 4,6   | 31,3    | 2,6   | 2,2   | --1,2       |
| Total Atomic %      | 17,6                   |                  | 42,4  |                |       | 36,1    |       |       | -1,2-       |

*Table S4: XPS composition table obtained for CMnO<sub>2</sub>-CHO*

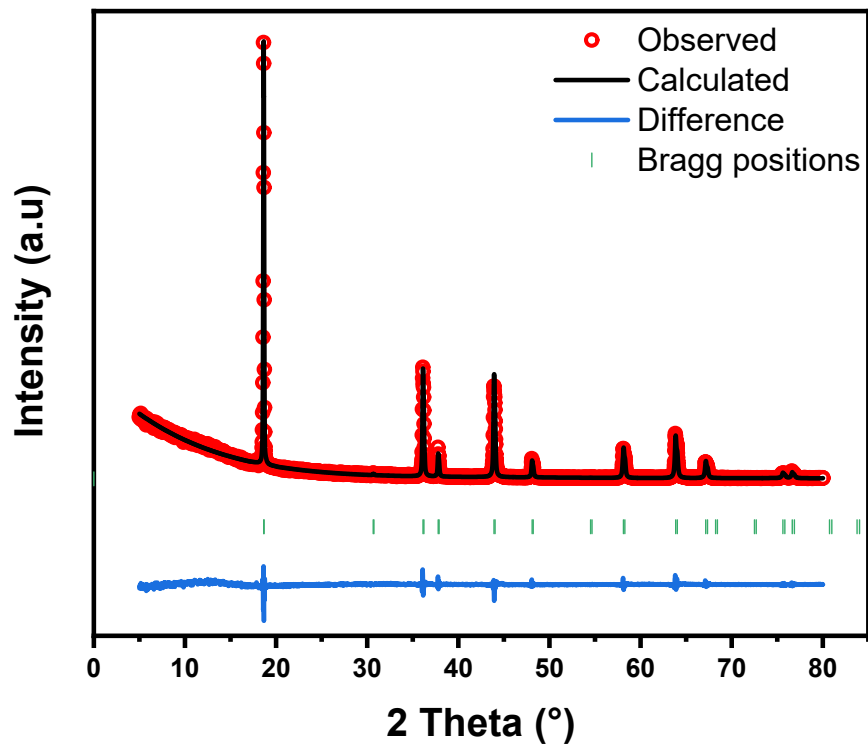

Figure S5: XRD Rietveld refinement of LMO-CHO

Table S5. Lattice and agreement parameters obtained after Rietveld refinement of LMO-CHO.

| Lattice Parameters |                       | Refinement Parameters |           |      |
|--------------------|-----------------------|-----------------------|-----------|------|
| $a$ (Å)            | $V$ (Å <sup>3</sup> ) | $R_{wp}$              | $R_{exp}$ | GoF  |
| 8.23943            | 559.360127            | 18.7                  | 11.39     | 2.71 |



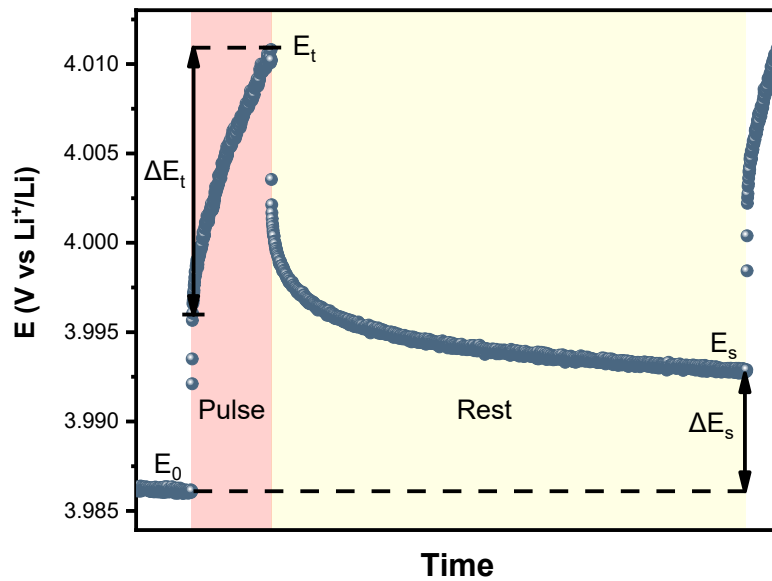

Figure S6. Schematic illustration for calculation of diffusion kinetics based on GITT curves
